# Supplementary material for: Visual assay of Escherichia coli O157:H7 based on an isothermal strand displacement and hybrid chain reaction amplification strategy
Source: Royal Society of Chemistry journal article supplement (doi:10.1039/d1ay00644d), 2021-01-01
Supplement: d1ay00644d1.pdf [file d1ay00644d1.pdf]

**Visual assay of *Escherichia coli* O157:H7 based on isothermal strand  
displacement and hybrid chain reaction amplification strategy**

Xiu Liu <sup>a, b, #</sup>, Shengjun Bu <sup>b, #</sup>, Hongguo Wei <sup>a, b</sup>, Ze Wang <sup>b</sup>, Songling Yu <sup>b</sup>, Zhongyi Li <sup>b</sup>, Zhuo Hao <sup>b</sup>,  
Xiuxia He <sup>a, \*</sup>, Jiayu Wan <sup>b, \*</sup>

<sup>a</sup> School of Life Science and Technology, Changchun University of Science and Technology, Changchun  
130022, China

<sup>b</sup> Institute of Military Veterinary, Academy of Military Medical Sciences, Changchun, 130122, China.

# These authors contributed equal work to this paper.

**\*Correspondence to**

chinese\_hxx@yahoo.com.cn (XX. He); Jiayu Wan; E-mail: wanjiayu@hotmail.com

**Fig S1**

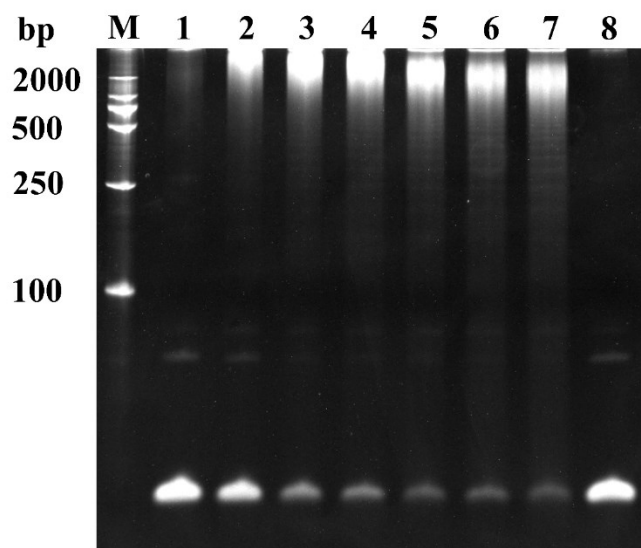

**Fig. S1.** PAGE results (M: marker; lanes 1-7: the ratios of RP and H1-biotin/H2-biotin were 1:1, 1:2, 1:4, 1:5, 1:6, 1:8, and 1:10, respectively). Lane 8 represents the mixture of H1-biotin/H2-biotin without RP. The concentration of H1-biotin/H2-biotin was 2  $\mu$ M.

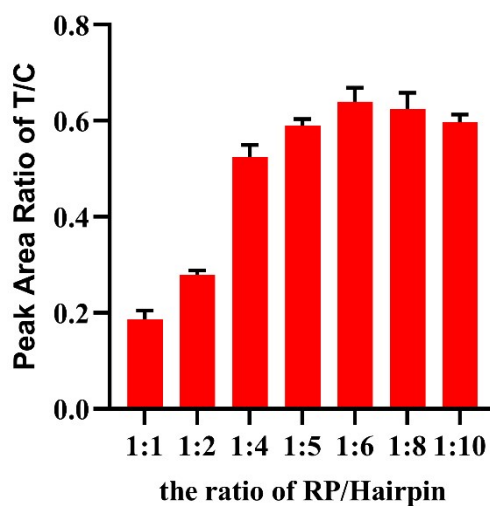

**Fig. S2.** The graph of the ratio of RP and H1-biotin/H2-biotin (1:1, 1:2, 1:4, 1:5, 1:6, 1:8, and 1:10). The concentration of H1-biotin/H2-biotin was 2  $\mu$ M.

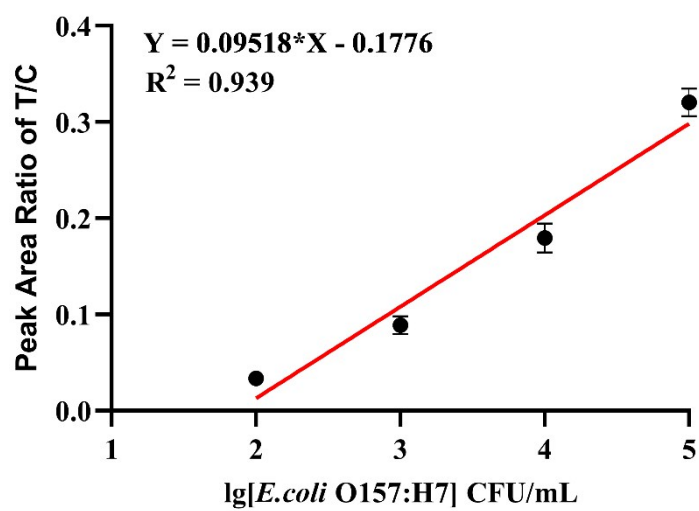

**Fig. S3.** Linear analysis of the proposed assay to detect *E. coli* O157:H7 with HCR signal amplification.

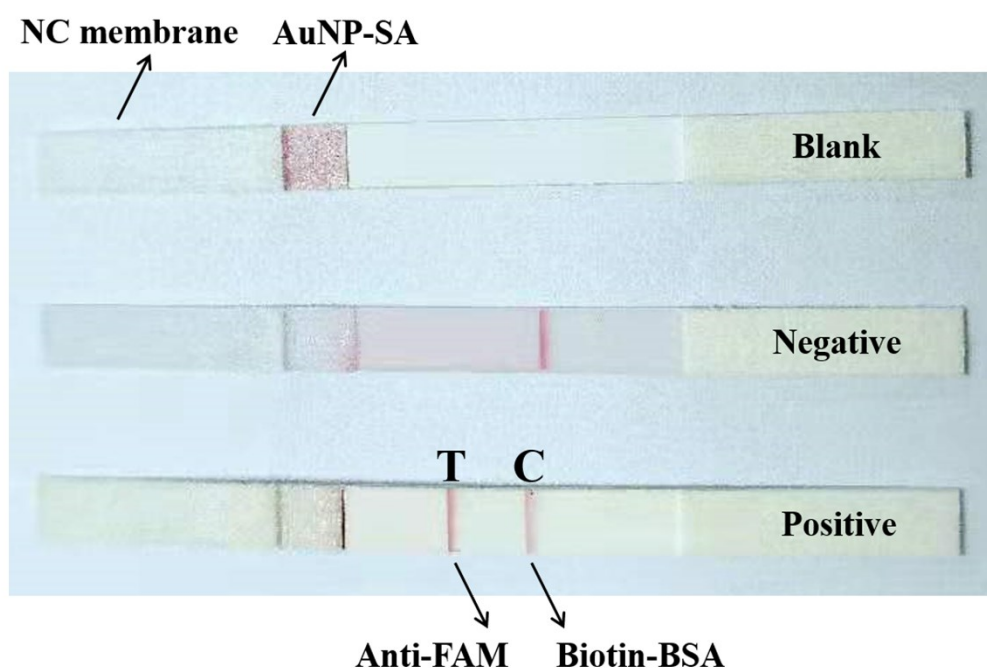

**Fig. S4.** The photograph of the text strip.

**Table S1.** Sequence of nucleic acids used in this study

| Name             | Abbreviation | Sequence (5'-3')                                                   |
|------------------|--------------|--------------------------------------------------------------------|
| Target           | Target       | <b>AGTACTTTCAGCGGGGAGGAAGGGAGTAAAGTTAATACCTTTGCTCATTGACGTTACC</b>  |
| Linker           | L            | GGTAACGTCAATGAGCAAAGGTATTAACCTTTACTCCCTTCCTCCCCGCTG                |
| Capture probe    | CP           | (FITC)TTAATACCTTTGCTCATTGACGTTACCTTT                               |
| Report probe     | RP           | GGTAACGTCAATAGTCTAGGATTCGGCGTGGGTAA                                |
| Hairpin 1-biotin | H1-bio       | (Biotin)TTTGGGTAGGGCGGGTTGGGATGGGTAAACGTCAATGAGCAAAGCATCCCAACCCATA |
| Hairpin 2-biotin | H2-bio       | TATGGGTTGGGATGCTTTGCTCATTGACGTTAGCATCCCAACTTT(Biotin)              |
| Helper 1         | Helper 1     | GTACTTTACAACCCGAAGGCCTTCTTCATACACGC                                |
| Helper 2         | Helper 2     | CGGCTGCTGGCACGGAGTTAGCCGGTGCTTCTTCT                                |

The bold sequence represents the RNA sequence, and the remaining sequences are the DNA sequence.
